# Supplementary material for: 4He/3He separation using oxygen-functionalized nanoporous graphene
Source: Royal Society of Chemistry journal article supplement (doi:10.1039/c9cp01364d), 2019-01-01
Supplement: c9cp01364d1.pdf [file c9cp01364d1.pdf]

## **Supplementary material**

Table 1: Quantum and classical thermally weighted transmission functions and the values of  $k_i^{TST}(T)$  for both isotope, for the model pore P5.

| $T$ (K) | $p_4(T)$    | $p_3(T)$    | $p_{classic}(T)$ | $k_4^{TST}(T)$ | $k_3^{TST}(T)$ |
|---------|-------------|-------------|------------------|----------------|----------------|
| 10      | 9.9407E-14  | 1.03112E-11 | 3.54293E-50      | 2.09866E-30    | 3.84494E-31    |
| 15      | 1.82485E-13 | 1.1029E-11  | 3.94233E-34      | 2.52295E-25    | 8.13844E-26    |
| 20      | 3.02771E-13 | 1.12098E-11 | 4.33437E-26      | 8.3839E-23     | 3.58856E-23    |
| 25      | 5.912E-13   | 1.30875E-11 | 2.96643E-21      | 2.66316E-21    | 1.35075E-21    |
| 30      | 1.2531E-12  | 1.64516E-11 | 5.04379E-18      | 2.6268E-20     | 1.49189E-20    |
| 35      | 4.30042E-12 | 3.56114E-11 | 1.03565E-15      | 1.33139E-19    | 8.19779E-20    |
| 40      | 1.20584E-11 | 6.74987E-11 | 5.66529E-14      | 4.4585E-19     | 2.91655E-19    |
| 45      | 3.91847E-11 | 1.62608E-10 | 1.28186E-12      | 1.13401E-18    | 7.7751E-19     |
| 50      | 1.19896E-10 | 3.73689E-10 | 1.56235E-11      | 2.38153E-18    | 1.69519E-18    |
| 55      | 3.614E-10   | 8.82731E-10 | 1.21366E-10      | 4.3546E-18     | 3.19567E-18    |
| 60      | 1.38293E-09 | 2.6617E-09  | 6.72262E-10      | 7.18175E-18    | 5.40522E-18    |
| 65      | 4.56706E-09 | 7.56352E-09 | 2.86992E-09      | 1.0947E-17     | 8.41556E-18    |
| 70      | 1.31743E-08 | 1.97311E-08 | 9.98235E-09      | 1.56925E-17    | 1.22825E-17    |
| 75      | 3.37264E-08 | 4.7058E-08  | 2.94674E-08      | 2.14255E-17    | 1.70299E-17    |
| 80      | 7.79276E-08 | 1.03217E-07 | 7.61188E-08      | 2.81274E-17    | 2.26559E-17    |
| 90      | 3.23933E-07 | 3.99771E-07 | 3.71851E-07      | 4.42815E-17    | 3.6448E-17     |
| 100     | 1.0366E-06  | 1.22281E-06 | 1.32917E-06      | 6.37632E-17    | 5.33684E-17    |
| 110     | 2.97949E-06 | 3.11547E-06 | 3.78368E-06      | 8.61413E-17    | 7.30541E-17    |
| 120     | 6.37077E-06 | 6.88206E-06 | 9.07673E-06      | 1.11017E-16    | 9.51483E-17    |
| 10      | 9.9407E-14  | 1.03112E-11 | 3.54293E-50      | 2.09866E-30    | 3.84494E-31    |
| 15      | 1.82485E-13 | 1.1029E-11  | 3.94233E-34      | 2.52295E-25    | 8.13844E-26    |

---

---

|    |             |             |             |             |             |
|----|-------------|-------------|-------------|-------------|-------------|
| 20 | 3.02771E-13 | 1.12098E-11 | 4.33437E-26 | 8.3839E-23  | 3.58856E-23 |
| 25 | 5.912E-13   | 1.30875E-11 | 2.96643E-21 | 2.66316E-21 | 1.35075E-21 |
| 30 | 1.2531E-12  | 1.64516E-11 | 5.04379E-18 | 2.6268E-20  | 1.49189E-20 |
| 35 | 4.30042E-12 | 3.56114E-11 | 1.03565E-15 | 1.33139E-19 | 8.19779E-20 |

---

---

Table 2: Quantum and classical thermally weighted transmission functions and the values of  $k_i^{TST}(T)$  for both isotope, for the model pore P8.

| $T$ (K) | $p_4(T)$    | $p_3(T)$    | $p_{classic}(T)$ | $k_4^{TST}(T)$ | $k_3^{TST}(T)$ |
|---------|-------------|-------------|------------------|----------------|----------------|
| 10      | 4.74E-17    | 1.35083E-13 | 6.78099E-69      | 2.23438E-37    | 9.07622E-36    |
| 15      | 1.148E-16   | 1.4041E-13  | 1.24073E-46      | 5.66742E-30    | 5.81341E-29    |
| 20      | 4.0206E-16  | 1.45848E-13 | 1.74973E-35      | 2.7356E-26     | 1.41009E-25    |
| 25      | 2.00091E-15 | 1.54867E-13 | 8.7751E-29       | 4.32793E-24    | 1.47626E-23    |
| 30      | 6.58963E-15 | 1.73371E-13 | 2.61318E-24      | 1.24493E-22    | 3.22469E-22    |
| 35      | 1.67937E-14 | 2.51929E-13 | 4.14793E-21      | 1.35518E-21    | 2.88372E-21    |
| 40      | 4.85155E-14 | 4.83829E-13 | 1.05209E-18      | 8.04907E-21    | 1.47797E-20    |
| 45      | 1.48503E-13 | 1.1011E-12  | 7.85029E-17      | 3.19545E-20    | 5.23184E-20    |
| 50      | 4.41707E-13 | 2.55356E-12 | 2.48565E-15      | 9.57542E-20    | 1.43039E-19    |
| 55      | 1.4807E-12  | 6.99209E-12 | 4.21725E-14      | 2.33978E-19    | 3.24275E-19    |
| 60      | 4.7722E-12  | 1.8307E-11  | 4.4795E-13       | 4.90821E-19    | 6.39099E-19    |
| 65      | 1.79901E-11 | 5.48732E-11 | 3.31781E-12      | 9.1591E-19     | 1.13142E-18    |
| 70      | 5.75937E-11 | 1.38784E-10 | 1.85075E-11      | 1.55952E-18    | 1.8417E-18     |
| 75      | 1.81969E-10 | 3.51141E-10 | 8.22742E-11      | 2.46839E-18    | 2.80401E-18    |
| 80      | 5.16107E-10 | 8.24215E-10 | 3.04103E-10      | 3.68281E-18    | 4.04454E-18    |
| 90      | 3.46972E-09 | 4.84919E-09 | 2.69963E-09      | 7.14827E-18    | 7.42491E-18    |
| 100     | 1.66076E-08 | 2.14362E-08 | 1.55637E-08      | 1.21122E-17    | 1.20421E-17    |
| 110     | 6.32215E-08 | 7.50979E-08 | 6.55181E-08      | 1.86137E-17    | 1.78692E-17    |
| 120     | 1.98215E-07 | 2.18104E-07 | 2.17785E-07      | 2.66093E-17    | 2.48289E-17    |
| 10      | 4.74E-17    | 1.35083E-13 | 6.78099E-69      | 2.23438E-37    | 9.07622E-36    |
| 15      | 1.148E-16   | 1.4041E-13  | 1.24073E-46      | 5.66742E-30    | 5.81341E-29    |

---

---

|    |             |             |             |             |             |
|----|-------------|-------------|-------------|-------------|-------------|
| 20 | 4.0206E-16  | 1.45848E-13 | 1.74973E-35 | 2.7356E-26  | 1.41009E-25 |
| 25 | 2.00091E-15 | 1.54867E-13 | 8.7751E-29  | 4.32793E-24 | 1.47626E-23 |
| 30 | 6.58963E-15 | 1.73371E-13 | 2.61318E-24 | 1.24493E-22 | 3.22469E-22 |
| 35 | 1.67937E-14 | 2.51929E-13 | 4.14793E-21 | 1.35518E-21 | 2.88372E-21 |

---

---

Table 3: Quantum and classical thermally weighted transmission functions and the values of  $k_i^{TST}(T)$  for both isotope, for the model pore P9.

| $T$ (K) | $p_4(T)$    | $p_3(T)$    | $p_{classic}(T)$ | $k_4^{TST}(T)$ | $k_3^{TST}(T)$ |
|---------|-------------|-------------|------------------|----------------|----------------|
| 10      | 5.15131E-12 | 1.28675E-10 | 5.81938E-34      | 4.15065E-35    | 2.24861E-35    |
| 15      | 6.81527E-12 | 1.33539E-10 | 2.72292E-23      | 1.84512E-28    | 1.22619E-28    |
| 20      | 9.2844E-12  | 1.38035E-10 | 6.13578E-18      | 3.72849E-25    | 2.7443E-25     |
| 25      | 1.62126E-11 | 1.68315E-10 | 1.0233E-14       | 3.49836E-23    | 2.73769E-23    |
| 30      | 4.55062E-11 | 3.07799E-10 | 1.46197E-12      | 7.10337E-22    | 5.7907E-22     |
| 35      | 2.20375E-10 | 8.96084E-10 | 5.11687E-11      | 6.02937E-21    | 5.06074E-21    |
| 40      | 1.5351E-09  | 3.61698E-09 | 7.42381E-10      | 2.97161E-20    | 2.54941E-20    |
| 45      | 8.41177E-09 | 1.39837E-08 | 5.98217E-09      | 1.02039E-19    | 8.90442E-20    |
| 50      | 3.54328E-08 | 5.06938E-08 | 3.19167E-08      | 2.72271E-19    | 2.40853E-19    |
| 55      | 1.19642E-07 | 1.56742E-07 | 1.26103E-07      | 6.05098E-19    | 5.4126E-19     |
| 60      | 3.36882E-07 | 4.1703E-07  | 3.97589E-07      | 1.173E-18      | 1.059E-18      |
| 65      | 8.20913E-07 | 9.76726E-07 | 1.0535E-06       | 2.04785E-18    | 1.8633E-18     |
| 70      | 1.77833E-06 | 2.05664E-06 | 2.4345E-06       | 3.29398E-18    | 3.01716E-18    |
| 75      | 3.50079E-06 | 3.96296E-06 | 5.04159E-06      | 4.96393E-18    | 4.57294E-18    |
| 80      | 6.36584E-06 | 7.08017E-06 | 9.54936E-06      | 7.0965E-18     | 6.5702E-18     |
| 90      | 0.0000174   | 0.0000189   | 2.78086E-05      | 1.28379E-17    | 1.19837E-17    |
| 100     | 0.0000395   | 0.0000421   | 6.56965E-05      | 2.05833E-17    | 1.93375E-17    |
| 110     | 0.00008     | 0.0000817   | 0.000133238      | 3.0265E-17     | 2.85792E-17    |
| 120     | 0.00014     | 0.000143    | 0.000240909      | 4.17421E-17    | 3.95805E-17    |
| 10      | 5.15131E-12 | 1.28675E-10 | 5.81938E-34      | 4.15065E-35    | 2.24861E-35    |
| 15      | 6.81527E-12 | 1.33539E-10 | 2.72292E-23      | 1.84512E-28    | 1.22619E-28    |

---

---

|    |             |             |             |             |             |
|----|-------------|-------------|-------------|-------------|-------------|
| 20 | 9.2844E-12  | 1.38035E-10 | 6.13578E-18 | 3.72849E-25 | 2.7443E-25  |
| 25 | 1.62126E-11 | 1.68315E-10 | 1.0233E-14  | 3.49836E-23 | 2.73769E-23 |
| 30 | 4.55062E-11 | 3.07799E-10 | 1.46197E-12 | 7.10337E-22 | 5.7907E-22  |
| 35 | 2.20375E-10 | 8.96084E-10 | 5.11687E-11 | 6.02937E-21 | 5.06074E-21 |

---

---

Table 4: Quantum and classical thermally weighted transmission functions and the values of  $k_i^{TST}(T)$  for both isotope, for the model pore P10.

| $T$ (K) | $p_4(T)$    | $p_3(T)$    | $p_{classic}(T)$ | $k_4^{TST}(T)$ | $k_3^{TST}(T)$ |
|---------|-------------|-------------|------------------|----------------|----------------|
| 10      | 3.45371E-10 | 6.4362E-09  | 2.32291E-27      | 1.04172E-29    | 6.88312E-30    |
| 15      | 6.13581E-10 | 7.1694E-09  | 7.11103E-19      | 7.34146E-25    | 5.56935E-25    |
| 20      | 9.5932E-10  | 6.6022E-09  | 1.29561E-14      | 1.86789E-22    | 1.51834E-22    |
| 25      | 1.58257E-09 | 7.0236E-09  | 4.77648E-12      | 5.05499E-21    | 4.28285E-21    |
| 30      | 2.90086E-09 | 9.29617E-09 | 2.49427E-10      | 4.4808E-20     | 3.9027E-20     |
| 35      | 6.45861E-09 | 1.50841E-08 | 4.25316E-09      | 2.10417E-19    | 1.8692E-19     |
| 40      | 1.50079E-08 | 2.75841E-08 | 3.59786E-08      | 6.65397E-19    | 5.99894E-19    |
| 45      | 3.32481E-08 | 5.0268E-08  | 1.90542E-07      | 1.61857E-18    | 1.47607E-18    |
| 50      | 6.74529E-08 | 9.2308E-08  | 7.26562E-07      | 3.27984E-18    | 3.01851E-18    |
| 55      | 1.61642E-07 | 2.06742E-07 | 2.18063E-06      | 5.82428E-18    | 5.40017E-18    |
| 60      | 4.06882E-07 | 4.9703E-07  | 5.46704E-06      | 9.37444E-18    | 8.7453E-18     |
| 65      | 8.20913E-07 | 9.66726E-07 | 1.19314E-05      | 1.39984E-17    | 1.31262E-17    |
| 70      | 1.77833E-06 | 2.05664E-06 | 2.33461E-05      | 1.97174E-17    | 1.85692E-17    |
| 75      | 3.50079E-06 | 3.96296E-06 | 4.18529E-05      | 2.65166E-17    | 2.50651E-17    |
| 80      | 6.36584E-06 | 7.08017E-06 | 6.98698E-05      | 3.43568E-17    | 3.25797E-17    |
| 90      | 0.0000174   | 0.000018823 | 0.000164826      | 5.29346E-17    | 5.04563E-17    |
| 100     | 0.0000395   | 0.000041803 | 0.000328958      | 7.49521E-17    | 7.17261E-17    |
| 110     | 0.00008     | 0.0000817   | 0.000581077      | 9.99151E-17    | 9.59108E-17    |
| 120     | 0.00014     | 0.00014665  | 0.000936285      | 1.27393E-16    | 1.22588E-16    |
| 10      | 3.45371E-10 | 6.4362E-09  | 2.32291E-27      | 1.04172E-29    | 6.88312E-30    |
| 15      | 6.13581E-10 | 7.1694E-09  | 7.11103E-19      | 7.34146E-25    | 5.56935E-25    |



---

---

|    |             |             |             |             |             |
|----|-------------|-------------|-------------|-------------|-------------|
| 20 | 9.5932E-10  | 6.6022E-09  | 1.29561E-14 | 1.86789E-22 | 1.51834E-22 |
| 25 | 1.58257E-09 | 7.0236E-09  | 4.77648E-12 | 5.05499E-21 | 4.28285E-21 |
| 30 | 2.90086E-09 | 9.29617E-09 | 2.49427E-10 | 4.4808E-20  | 3.9027E-20  |
| 35 | 6.45861E-09 | 1.50841E-08 | 4.25316E-09 | 2.10417E-19 | 1.8692E-19  |

---

---

Table 5: Quantum and classical thermally weighted transmission functions and the values of  $k_i^{TST}(T)$  for both isotope, for the model pore P11.

| $T$ (K) | $p_4(T)$    | $p_3(T)$    | $p_{classic}(T)$ | $k_4^{TST}(T)$ | $k_3^{TST}(T)$ |
|---------|-------------|-------------|------------------|----------------|----------------|
| 10      | 4.56065E-10 | 1.40608E-08 | 5.81938E-34      | 2.09866E-30    | 3.84494E-31    |
| 15      | 6.3515E-10  | 1.48737E-08 | 2.72292E-23      | 2.52295E-25    | 8.13844E-26    |
| 20      | 8.9834E-10  | 1.55556E-08 | 6.13578E-18      | 8.3839E-23     | 3.58856E-23    |
| 25      | 1.37872E-09 | 1.68035E-08 | 1.0233E-14       | 2.66316E-21    | 1.35075E-21    |
| 30      | 2.29774E-09 | 1.88923E-08 | 1.46197E-12      | 2.6268E-20     | 1.49189E-20    |
| 35      | 4.17265E-09 | 2.33378E-08 | 5.11687E-11      | 1.33139E-19    | 8.19779E-20    |
| 40      | 9.34747E-09 | 3.5879E-08  | 7.42381E-10      | 4.4585E-19     | 2.91655E-19    |
| 45      | 2.66229E-08 | 7.11109E-08 | 5.98217E-09      | 1.13401E-18    | 7.7751E-19     |
| 50      | 8.01936E-08 | 1.63896E-07 | 3.19167E-08      | 2.38153E-18    | 1.69519E-18    |
| 55      | 0.00000023  | 3.84391E-07 | 1.26103E-07      | 4.3546E-18     | 3.19567E-18    |
| 60      | 5.79331E-07 | 8.60089E-07 | 3.97589E-07      | 7.18175E-18    | 5.40522E-18    |
| 65      | 1.30182E-06 | 1.78874E-06 | 1.0535E-06       | 1.0947E-17     | 8.41556E-18    |
| 70      | 2.65167E-06 | 3.45171E-06 | 2.4345E-06       | 1.56925E-17    | 1.22825E-17    |
| 75      | 4.97271E-06 | 6.21867E-06 | 5.04159E-06      | 2.14255E-17    | 1.70299E-17    |
| 80      | 8.70348E-06 | 0.0000106   | 9.54936E-06      | 2.81274E-17    | 2.26559E-17    |
| 90      | 0.0000225   | 0.0000261   | 2.78086E-05      | 4.42815E-17    | 3.6448E-17     |
| 100     | 0.0000488   | 0.0000551   | 6.56965E-05      | 6.37632E-17    | 5.33684E-17    |
| 110     | 0.0000955   | 0.000103    | 0.000133238      | 8.61413E-17    | 7.30541E-17    |
| 120     | 0.000164    | 0.000174    | 0.000240909      | 1.11017E-16    | 9.51483E-17    |
| 10      | 4.56065E-10 | 1.40608E-08 | 5.81938E-34      | 2.09866E-30    | 3.84494E-31    |
| 15      | 6.3515E-10  | 1.48737E-08 | 2.72292E-23      | 2.52295E-25    | 8.13844E-26    |

---

---

|    |             |             |             |             |             |
|----|-------------|-------------|-------------|-------------|-------------|
| 20 | 8.9834E-10  | 1.55556E-08 | 6.13578E-18 | 8.3839E-23  | 3.58856E-23 |
| 25 | 1.37872E-09 | 1.68035E-08 | 1.0233E-14  | 2.66316E-21 | 1.35075E-21 |
| 30 | 2.29774E-09 | 1.88923E-08 | 1.46197E-12 | 2.6268E-20  | 1.49189E-20 |
| 35 | 4.17265E-09 | 2.33378E-08 | 5.11687E-11 | 1.33139E-19 | 8.19779E-20 |

---

---

Table 6: Quantum and classical thermally weighted transmission functions and the values of  $k_i^{TST}(T)$  for both isotope, for the model pore P7.

| $T$ (K) | $p_4(T)$    | $p_3(T)$    | $p_{classic}(T)$ | $k_4^{TST}(T)$ | $k_3^{TST}(T)$ |
|---------|-------------|-------------|------------------|----------------|----------------|
| 10      | 0.000084619 | 0.00045722  | 4.77648E-12      | 5.34644E-28    | 2.42139E-28    |
| 15      | 0.000136281 | 0.000584415 | 1.32696E-08      | 1.01389E-23    | 5.9794E-24     |
| 20      | 0.000221836 | 0.000767799 | 7.26562E-07      | 1.33817E-21    | 9.00555E-22    |
| 25      | 0.000365068 | 0.00100464  | 8.20078E-06      | 2.44285E-20    | 1.77941E-20    |
| 30      | 0.000575818 | 0.00124289  | 4.18529E-05      | 1.66604E-19    | 1.27919E-19    |
| 35      | 0.000837699 | 0.00154148  | 0.000135398      | 6.49209E-19    | 5.17466E-19    |
| 40      | 0.00113001  | 0.00182337  | 0.000328958      | 1.78671E-18    | 1.46426E-18    |
| 45      | 0.00141376  | 0.00218279  | 0.00065972       | 3.90594E-18    | 3.26994E-18    |
| 50      | 0.00187424  | 0.00262216  | 0.001156062      | 7.27679E-18    | 6.19463E-18    |
| 55      | 0.00229568  | 0.00305265  | 0.001835632      | 1.208E-17      | 1.0422E-17     |
| 60      | 0.002691025 | 0.00350622  | 0.002706007      | 1.84063E-17    | 1.60533E-17    |
| 65      | 0.00317023  | 0.003953321 | 0.003766543      | 2.62722E-17    | 2.31194E-17    |
| 70      | 0.0037843   | 0.004551326 | 0.005010512      | 3.56411E-17    | 3.15981E-17    |
| 75      | 0.00437956  | 0.005300236 | 0.006427055      | 4.64424E-17    | 4.1432E-17     |
| 80      | 0.00499511  | 0.005989234 | 0.00800279       | 5.85865E-17    | 5.25434E-17    |
| 90      | 0.00664569  | 0.00776216  | 0.01157266       | 8.65153E-17    | 7.82472E-17    |
| 100     | 0.0084123   | 0.00965332  | 0.015601049      | 1.18673E-16    | 1.08011E-16    |
| 110     | 0.01008223  | 0.01172216  | 0.019977126      | 1.54401E-16    | 1.41211E-16    |
| 120     | 0.0120796   | 0.01402201  | 0.024605016      | 1.93165E-16    | 1.77334E-16    |
| 10      | 0.000084619 | 0.00045722  | 4.77648E-12      | 5.34644E-28    | 2.42139E-28    |
| 15      | 0.000136281 | 0.000584415 | 1.32696E-08      | 1.01389E-23    | 5.9794E-24     |

---

---

|    |             |             |             |             |             |
|----|-------------|-------------|-------------|-------------|-------------|
| 20 | 0.000221836 | 0.000767799 | 7.26562E-07 | 1.33817E-21 | 9.00555E-22 |
| 25 | 0.000365068 | 0.00100464  | 8.20078E-06 | 2.44285E-20 | 1.77941E-20 |
| 30 | 0.000575818 | 0.00124289  | 4.18529E-05 | 1.66604E-19 | 1.27919E-19 |
| 35 | 0.000837699 | 0.00154148  | 0.000135398 | 6.49209E-19 | 5.17466E-19 |

---

---

Table 7: Quantum and classical thermally weighted transmission functions and the values of  $k_i^{TST}(T)$  for both isotope, for the model pore P13.

| $T$ (K) | $p_4(T)$    | $p_3(T)$    | $p_{classic}(T)$ | $k_4^{TST}(T)$ | $k_3^{TST}(T)$ |
|---------|-------------|-------------|------------------|----------------|----------------|
| 10      | 1.18568E-05 | 5.14997E-05 | 3.98333E-15      | 4.14562E-27    | 1.61543E-27    |
| 15      | 0.000016932 | 6.23979E-05 | 1.12935E-10      | 3.97198E-23    | 2.11905E-23    |
| 20      | 2.55426E-05 | 8.19505E-05 | 1.97713E-08      | 3.72624E-21    | 2.32606E-21    |
| 25      | 3.65516E-05 | 0.000105801 | 4.48504E-07      | 5.542E-20      | 3.80139E-20    |
| 30      | 5.60761E-05 | 0.000142362 | 3.64707E-06      | 3.29638E-19    | 2.40759E-19    |
| 35      | 9.01068E-05 | 0.000197641 | 1.64626E-05      | 1.1645E-18     | 8.89453E-19    |
| 40      | 0.000161486 | 0.000313329 | 5.13644E-05      | 2.97625E-18    | 2.35056E-18    |
| 45      | 0.000254746 | 0.00044572  | 0.000125165      | 6.13991E-18    | 4.97588E-18    |
| 50      | 0.0003743   | 0.000598072 | 0.000256377      | 1.09165E-17    | 9.0294E-18     |
| 55      | 0.000534    | 0.000833    | 0.000462607      | 1.74386E-17    | 1.46633E-17    |
| 60      | 0.000743    | 0.00108     | 0.000758747      | 2.57303E-17    | 2.19287E-17    |
| 65      | 0.001       | 0.00138     | 0.001156062      | 3.57397E-17    | 3.08009E-17    |
| 70      | 0.00131     | 0.00173     | 0.001662001      | 4.7369E-17     | 4.12063E-17    |
| 75      | 0.00168     | 0.00213     | 0.002280461      | 6.04978E-17    | 5.3044E-17     |
| 80      | 0.00209     | 0.00258     | 0.003012284      | 7.49994E-17    | 6.62025E-17    |
| 90      | 0.00307     | 0.00364     | 0.004807591      | 1.07635E-16    | 9.60371E-17    |
| 100     | 0.00423     | 0.00486     | 0.007015052      | 1.44404E-16    | 1.29893E-16    |
| 110     | 0.00554     | 0.00624     | 0.009585914      | 1.84614E-16    | 1.67105E-16    |
| 120     | 0.00699     | 0.00774     | 0.012465833      | 2.27741E-16    | 2.07158E-16    |
| 10      | 1.18568E-05 | 5.14997E-05 | 3.98333E-15      | 4.14562E-27    | 1.61543E-27    |
| 15      | 0.000016932 | 6.23979E-05 | 1.12935E-10      | 3.97198E-23    | 2.11905E-23    |

---

---

|    |             |             |             |             |             |
|----|-------------|-------------|-------------|-------------|-------------|
| 20 | 2.55426E-05 | 8.19505E-05 | 1.97713E-08 | 3.72624E-21 | 2.32606E-21 |
| 25 | 3.65516E-05 | 0.000105801 | 4.48504E-07 | 5.542E-20   | 3.80139E-20 |
| 30 | 5.60761E-05 | 0.000142362 | 3.64707E-06 | 3.29638E-19 | 2.40759E-19 |
| 35 | 9.01068E-05 | 0.000197641 | 1.64626E-05 | 1.1645E-18  | 8.89453E-19 |

---

---

Table 8: Quantum and classical thermally weighted transmission functions and the values of  $k_i^{TST}(T)$  for both isotope, for the model pore P14.

| $T$ (K) | $p_4(T)$    | $p_3(T)$    | $p_{classic}(T)$ | $k_4^{TST}(T)$ | $k_3^{TST}(T)$ |
|---------|-------------|-------------|------------------|----------------|----------------|
| 10      | 2.00235E-07 | 2.84981E-06 | 9.17773E-22      | 1.06855E-33    | 2.66797E-38    |
| 15      | 3.4033E-07  | 2.92306E-06 | 3.98333E-15      | 1.60871E-27    | 1.19293E-30    |
| 20      | 6.4288E-07  | 3.26503E-06 | 8.63728E-12      | 1.89179E-24    | 7.64513E-27    |
| 25      | 1.32354E-06 | 4.07189E-06 | 8.87566E-10      | 1.28273E-22    | 1.43375E-24    |
| 30      | 0.000002235 | 5.1155E-06  | 1.97713E-08      | 2.09745E-21    | 4.61933E-23    |
| 35      | 3.7235E-06  | 6.80852E-06 | 1.83406E-07      | 1.52519E-20    | 5.45259E-22    |
| 40      | 5.85211E-06 | 9.78087E-06 | 9.82574E-07      | 6.69377E-20    | 3.44137E-21    |
| 45      | 0.000009623 | 0.0000151   | 3.64707E-06      | 2.10029E-19    | 1.4323E-20     |
| 50      | 1.58455E-05 | 0.000024    | 1.04633E-05      | 5.21446E-19    | 4.45724E-20    |
| 55      | 0.00002632  | 0.0000382   | 2.48788E-05      | 1.0926E-18     | 1.12331E-19    |
| 60      | 0.00004259  | 0.00006     | 5.13644E-05      | 2.01688E-18    | 2.4178E-19     |
| 65      | 0.00006725  | 0.0000914   | 9.5104E-05       | 3.37882E-18    | 4.61094E-19    |
| 70      | 0.000102    | 0.000134    | 0.000161614      | 5.24705E-18    | 7.99831E-19    |
| 75      | 0.000151    | 0.000192    | 0.000256377      | 7.67134E-18    | 1.28645E-18    |
| 80      | 0.000214    | 0.000264    | 0.00038454       | 1.06827E-17    | 1.94641E-18    |
| 90      | 0.000393    | 0.000464    | 0.000758747      | 1.85097E-17    | 3.8663E-18     |
| 100     | 0.000649    | 0.000744    | 0.001312377      | 2.86946E-17    | 6.67157E-18    |
| 110     | 0.000993    | 0.00111     | 0.002061697      | 4.10776E-17    | 1.04037E-17    |
| 120     | 0.00142     | 0.00156     | 0.003012284      | 5.54449E-17    | 1.5051E-17     |
| 10      | 2.00235E-07 | 2.84981E-06 | 9.17773E-22      | 1.06855E-33    | 2.66797E-38    |
| 15      | 3.4033E-07  | 2.92306E-06 | 3.98333E-15      | 1.60871E-27    | 1.19293E-30    |



---

---

|    |             |             |             |             |             |
|----|-------------|-------------|-------------|-------------|-------------|
| 20 | 6.4288E-07  | 3.26503E-06 | 8.63728E-12 | 1.89179E-24 | 7.64513E-27 |
| 25 | 1.32354E-06 | 4.07189E-06 | 8.87566E-10 | 1.28273E-22 | 1.43375E-24 |
| 30 | 0.000002235 | 5.1155E-06  | 1.97713E-08 | 2.09745E-21 | 4.61933E-23 |
| 35 | 3.7235E-06  | 6.80852E-06 | 1.83406E-07 | 1.52519E-20 | 5.45259E-22 |

---

---

Table 2: Quantum and classical thermally weighted transmission functions and the values of  $k_i^{TST}(T)$  for both isotope, for the model pore P8.

| $T$ (K) | $p_4(T)$    | $p_3(T)$    | $p_{classic}(T)$ | $k_4^{TST}(T)$ | $k_3^{TST}(T)$ |
|---------|-------------|-------------|------------------|----------------|----------------|
| 10      | 9.9407E-14  | 1.03112E-11 | 3.54293E-50      | 2.09866E-30    | 3.84494E-31    |
| 15      | 1.82485E-13 | 1.1029E-11  | 3.94233E-34      | 2.52295E-25    | 8.13844E-26    |
| 20      | 3.02771E-13 | 1.12098E-11 | 4.33437E-26      | 8.3839E-23     | 3.58856E-23    |
| 25      | 5.912E-13   | 1.30875E-11 | 2.96643E-21      | 2.66316E-21    | 1.35075E-21    |
| 30      | 1.2531E-12  | 1.64516E-11 | 5.04379E-18      | 2.6268E-20     | 1.49189E-20    |
| 35      | 4.30042E-12 | 3.56114E-11 | 1.03565E-15      | 1.33139E-19    | 8.19779E-20    |
| 40      | 1.20584E-11 | 6.74987E-11 | 5.66529E-14      | 4.4585E-19     | 2.91655E-19    |
| 45      | 3.91847E-11 | 1.62608E-10 | 1.28186E-12      | 1.13401E-18    | 7.7751E-19     |
| 50      | 1.19896E-10 | 3.73689E-10 | 1.56235E-11      | 2.38153E-18    | 1.69519E-18    |
| 55      | 3.614E-10   | 8.82731E-10 | 1.21366E-10      | 4.3546E-18     | 3.19567E-18    |
| 60      | 1.38293E-09 | 2.6617E-09  | 6.72262E-10      | 7.18175E-18    | 5.40522E-18    |
| 65      | 4.56706E-09 | 7.56352E-09 | 2.86992E-09      | 1.0947E-17     | 8.41556E-18    |
| 70      | 1.31743E-08 | 1.97311E-08 | 9.98235E-09      | 1.56925E-17    | 1.22825E-17    |
| 75      | 3.37264E-08 | 4.7058E-08  | 2.94674E-08      | 2.14255E-17    | 1.70299E-17    |
| 80      | 7.79276E-08 | 1.03217E-07 | 7.61188E-08      | 2.81274E-17    | 2.26559E-17    |
| 90      | 3.23933E-07 | 3.99771E-07 | 3.71851E-07      | 4.42815E-17    | 3.6448E-17     |
| 100     | 1.0366E-06  | 1.22281E-06 | 1.32917E-06      | 6.37632E-17    | 5.33684E-17    |
| 110     | 2.97949E-06 | 3.11547E-06 | 3.78368E-06      | 8.61413E-17    | 7.30541E-17    |
| 120     | 6.37077E-06 | 6.88206E-06 | 9.07673E-06      | 1.11017E-16    | 9.51483E-17    |
| 10      | 9.9407E-14  | 1.03112E-11 | 3.54293E-50      | 2.09866E-30    | 3.84494E-31    |
| 15      | 1.82485E-13 | 1.1029E-11  | 3.94233E-34      | 2.52295E-25    | 8.13844E-26    |

---

---

|    |             |             |             |             |             |
|----|-------------|-------------|-------------|-------------|-------------|
| 20 | 3.02771E-13 | 1.12098E-11 | 4.33437E-26 | 8.3839E-23  | 3.58856E-23 |
| 25 | 5.912E-13   | 1.30875E-11 | 2.96643E-21 | 2.66316E-21 | 1.35075E-21 |
| 30 | 1.2531E-12  | 1.64516E-11 | 5.04379E-18 | 2.6268E-20  | 1.49189E-20 |
| 35 | 4.30042E-12 | 3.56114E-11 | 1.03565E-15 | 1.33139E-19 | 8.19779E-20 |

---

---
